# Supplementary material
Source: PubMed Central journal article supplement (PMC3615694)
Supplement: Supp_Figure1.pdf [file Supp_Figure1.pdf]

## Supplementary Data

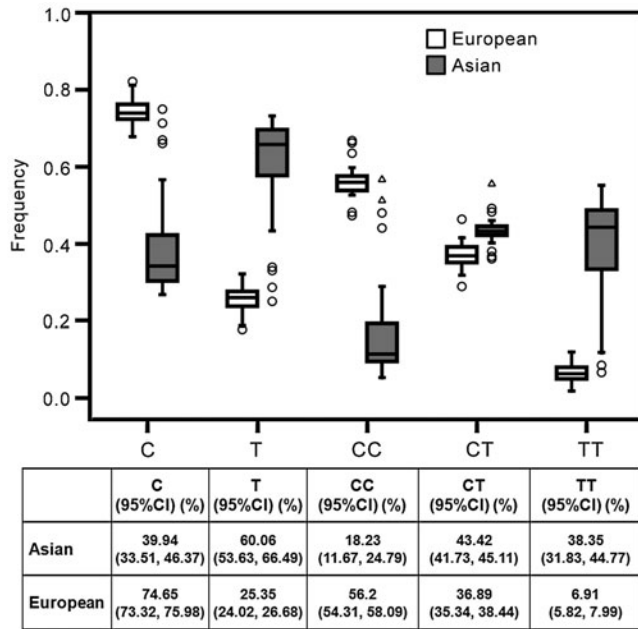

**SUPPLEMENTARY FIG. S1.** Frequencies of the alleles and genotypes among controls stratified by ethnicities. The “○” and “△” represent outliers.
