# Supplementary material
Source: PubMed Central journal article supplement (PMC3615694)
Supplement: Supp_Figure2.pdf [file Supp_Figure2.pdf]

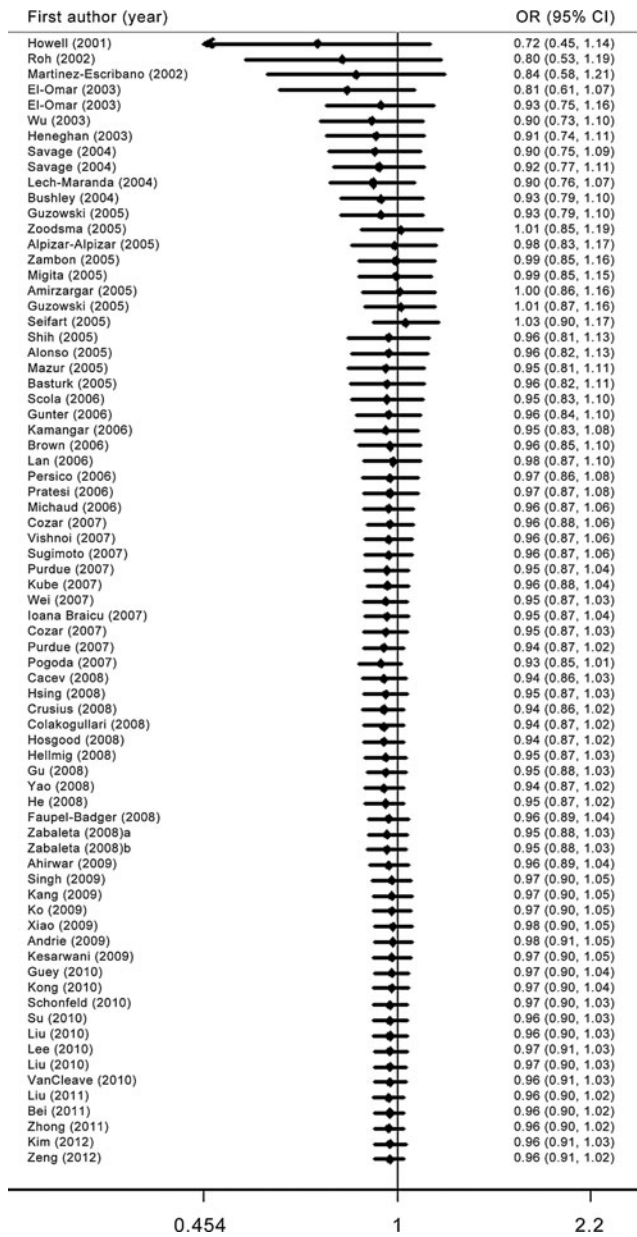

**SUPPLEMENTARY FIG. S2.** Results from cumulative meta-analysis of associations between the *IL-10* -819C/T polymorphism TT/CT genotypes, as compared with the CC genotype, and cancer risk 2001–2012. Studies sorted by publication time. The circles and horizontal lines show the accumulation of estimates as results from each study were added, rather than the estimate for each individual study. Bars, 95% confidence interval (CI).
