# Supplementary material
Source: PubMed Central journal article supplement (PMC3615694)
Supplement: Supp_Table1.pdf [file Supp_Table1.pdf]

SUPPLEMENTARY TABLE 1. SUMMARY CHARACTERISTICS OF ELIGIBLE STUDIES FOR OVERALL AND SUBGROUP STRATIFIED BY THE STUDY CHARACTERISTIC OF ETHNICITY, CANCER TYPES, STUDY DESIGN, SAMPLE SIZE, AND GENOTYPING METHOD

| Group             | N <sup>a</sup> | Cases/Controls | Case  |       |      |      |      | Control |       |      |      |      |
|-------------------|----------------|----------------|-------|-------|------|------|------|---------|-------|------|------|------|
|                   |                |                | C     | T     | CC   | CT   | TT   | C       | T     | CC   | CT   | TT   |
| Overall           | 73             | 15942/22336    | 20100 | 11784 | 6971 | 6158 | 2813 | 27356   | 17316 | 9359 | 8638 | 4339 |
| Ethnicity         |                |                |       |       |      |      |      |         |       |      |      |      |
| African           | 2              | 255/754        | 320   | 190   | 102  | 116  | 37   | 909     | 599   | 285  | 339  | 130  |
| Asian             | 31             | 5442/7911      | 4519  | 6365  | 1072 | 2375 | 1995 | 6142    | 9680  | 1399 | 3344 | 3168 |
| European          | 27             | 5437/8036      | 8161  | 2713  | 3078 | 2005 | 354  | 12110   | 3962  | 4601 | 2908 | 527  |
| Mixed             | 13             | 4808/5635      | 7100  | 2516  | 2719 | 1662 | 427  | 8195    | 3075  | 3074 | 2047 | 514  |
| Cancer type       |                |                |       |       |      |      |      |         |       |      |      |      |
| bladder           | 2              | 1231/1447      | 1673  | 789   | 589  | 495  | 147  | 1933    | 961   | 676  | 581  | 190  |
| breast            | 4              | 1278/1512      | 1722  | 834   | 625  | 472  | 181  | 2010    | 1014  | 720  | 570  | 222  |
| cervical          | 3              | 948/947        | 1284  | 612   | 460  | 364  | 124  | 1307    | 587   | 497  | 313  | 137  |
| colorectal        | 3              | 477/544        | 701   | 253   | 260  | 181  | 36   | 835     | 253   | 321  | 193  | 30   |
| esophageal        | 2              | 277/592        | 338   | 216   | 124  | 90   | 63   | 585     | 599   | 176  | 233  | 183  |
| gallbladder       | 2              | 319/773        | 238   | 400   | 55   | 128  | 136  | 550     | 996   | 95   | 360  | 318  |
| gastric           | 15             | 2783/5198      | 2541  | 3025  | 687  | 1167 | 929  | 5130    | 5266  | 1539 | 2052 | 1607 |
| Asian             | 10             | 1968/3053      | 1323  | 2613  | 211  | 901  | 856  | 1923    | 4183  | 325  | 1273 | 1455 |
| European          | 3              | 456/1890       | 695   | 217   | 273  | 149  | 34   | 2823    | 957   | 1069 | 685  | 136  |
| hepatocellular    | 4              | 905/1074       | 1051  | 759   | 335  | 381  | 189  | 1174    | 974   | 365  | 444  | 265  |
| Laposi sarcoma    | 1              | 132/168        | 187   | 77    | 64   | 59   | 9    | 243     | 93    | 92   | 59   | 17   |
| leukemia          | 2              | 47/65          | 60    | 34    | 20   | 20   | 7    | 99      | 31    | 35   | 29   | 1    |
| lung              | 4              | 503/795        | 536   | 470   | 165  | 206  | 132  | 912     | 678   | 304  | 304  | 187  |
| Asian             | 3              | 320/372        | 263   | 377   | 65   | 133  | 122  | 266     | 478   | 53   | 160  | 159  |
| lymphoma          | 7              | 1747/1820      | 2662  | 832   | 1006 | 650  | 91   | 2757    | 883   | 1040 | 677  | 103  |
| European          | 5              | 718/758        | 1064  | 372   | 390  | 284  | 44   | 1128    | 388   | 416  | 296  | 46   |
| melanoma          | 5              | 530/540        | 808   | 252   | 306  | 196  | 28   | 810     | 270   | 302  | 206  | 32   |
| European          | 3              | 290/306        | 449   | 131   | 173  | 103  | 14   | 454     | 158   | 171  | 112  | 23   |
| multiple myeloma  | 2              | 166/549        | 252   | 80    | 96   | 60   | 10   | 830     | 268   | 314  | 202  | 33   |
| nasopharyngeal    | 2              | 287/340        | 283   | 291   | 83   | 117  | 87   | 334     | 346   | 94   | 146  | 100  |
| oral              | 1              | 280/300        | 214   | 346   | 47   | 120  | 113  | 208     | 392   | 37   | 134  | 129  |
| ovarian           | 3              | 361/438        | 325   | 397   | 102  | 121  | 138  | 419     | 457   | 151  | 117  | 170  |
| prostate          | 7              | 2891/3804      | 4010  | 1772  | 1469 | 1072 | 350  | 5090    | 2518  | 1796 | 1498 | 510  |
| renal             | 2              | 156/225        | 239   | 73    | 94   | 51   | 11   | 326     | 124   | 122  | 82   | 21   |
| testicular        | 1              | 504/605        | 777   | 231   | 302  | 173  | 29   | 901     | 309   | 342  | 217  | 46   |
| mixed             | 1              | 120/600        | 199   | 41    | 82   | 35   | 3    | 903     | 297   | 341  | 221  | 38   |
| Study design      |                |                |       |       |      |      |      |         |       |      |      |      |
| HCC               | 42             | 7476/9273      | 8652  | 6300  | 2805 | 3042 | 1629 | 10322   | 8224  | 3289 | 3744 | 2240 |
| PCC               | 29             | 8027/11765     | 10772 | 5282  | 3906 | 2960 | 1161 | 15073   | 8457  | 5320 | 4433 | 2012 |
| NCC               | 2              | 439/1298       | 676   | 202   | 260  | 156  | 23   | 1961    | 635   | 750  | 461  | 87   |
| Sample size       |                |                |       |       |      |      |      |         |       |      |      |      |
| < 500             | 48             | 5471/7263      | 6248  | 4694  | 2024 | 2200 | 1247 | 7650    | 6876  | 2387 | 2876 | 2000 |
| ≥ 500             | 25             | 10471/15073    | 13852 | 7090  | 4947 | 3958 | 1566 | 19706   | 10440 | 6972 | 5762 | 2339 |
| Genotyping method |                |                |       |       |      |      |      |         |       |      |      |      |
| PCR-RFLP          | 16             | 3147/3724      | 3075  | 3219  | 869  | 1337 | 941  | 3377    | 4071  | 917  | 1543 | 1264 |
| TaqMan            | 25             | 8172/11557     | 11863 | 4481  | 4450 | 2963 | 759  | 16081   | 7033  | 5871 | 4339 | 1347 |
| other             | 32             | 4623/7055      | 5162  | 4084  | 1652 | 1858 | 1113 | 7898    | 6212  | 2571 | 2756 | 1728 |

<sup>a</sup>Number of studies. HCC, hospital-based case-control; HWE, Hardy-Weinberg equilibrium; NCC, nested case-control study; PCC, population-based case-control; PCR-RFLP, polymerase chain reaction-restriction fragment length polymorphism.
