# Supplementary material
Source: PubMed Central journal article supplement (PMC3615694)
Supplement: Supp_Table2.pdf [file Supp_Table2.pdf]

SUPPLEMENTARY TABLE S2. ODDS RATIOS AND CORRESPONDING 95% CONFIDENCE INTERVALS OF EACH GENOTYPE OF THE IL-10 -819C/T POLYMORPHISM IN SENSITIVITY ANALYSES FOR OVERALL AND SUBGROUPS BY A RANDOM-EFFECTS MODEL

| Group             | N <sup>a</sup> Cases/Controls | T vs. C     |                   |            | TT vs. CC         |            |                   | CT vs. CC  |                   |            | TT vs. CT                |             |                   | TT/CT vs. CC |                          |             | TT vs. CT/CC |            |   | TT/CC vs. CT |   |  |
|-------------------|-------------------------------|-------------|-------------------|------------|-------------------|------------|-------------------|------------|-------------------|------------|--------------------------|-------------|-------------------|--------------|--------------------------|-------------|--------------|------------|---|--------------|---|--|
|                   |                               | OR (95%CI)  | P                 | OR (95%CI) | P                 | OR (95%CI) | P                 | OR (95%CI) | P                 | OR (95%CI) | P                        | OR (95%CI)  | P                 | OR (95%CI)   | P                        | OR (95%CI)  | P            | OR (95%CI) | P | OR (95%CI)   | P |  |
| Overall           | 62                            | 13923/18471 | 0.95 (0.91, 1.00) | 0.06       | 0.90 (0.81, 1.00) | 0.06       | 0.95 (0.90, 1.01) | 0.14       | 0.97 (0.89, 1.05) | 0.48       | 0.94 (0.89, 1.01)        | 0.10        | 0.94 (0.86, 1.02) | 0.17         | 1.01 (0.96, 1.06)        | 0.63        |              |            |   |              |   |  |
| Ethnicity         |                               |             |                   |            |                   |            |                   |            |                   |            |                          |             |                   |              |                          |             |              |            |   |              |   |  |
| Asian             | 24                            | 4054/6034   | 0.91 (0.84, 0.98) | 0.01       | 0.81 (0.70, 0.94) | 0.00       | 0.89 (0.79, 1.01) | 0.07       | 0.94 (0.84, 1.05) | 0.30       | <b>0.86 (0.76, 0.98)</b> | <b>0.02</b> | 0.90 (0.81, 1.01) | 0.08         | 0.99 (0.90, 1.09)        | 0.93        |              |            |   |              |   |  |
| European          | 25                            | 5178/6902   | 1.00 (0.91, 1.10) | 0.96       | 0.99 (0.79, 1.23) | 0.94       | 1.02 (0.92, 1.13) | 0.67       | 0.99 (0.81, 1.21) | 0.95       | 1.01 (0.91, 1.12)        | 0.79        | 0.99 (0.80, 1.22) | 0.94         | 0.97 (0.88, 1.07)        | 0.60        |              |            |   |              |   |  |
| Cancer type       |                               |             |                   |            |                   |            |                   |            |                   |            |                          |             |                   |              |                          |             |              |            |   |              |   |  |
| breast            | 3                             | 963/1190    | 0.90 (0.78, 1.03) | 0.15       | 0.83 (0.59, 1.18) | 0.31       | 0.89 (0.75, 1.07) | 0.25       | 0.93 (0.65, 1.33) | 0.69       | 0.88 (0.74, 1.05)        | 0.17        | 0.87 (0.62, 1.22) | 0.42         | 1.09 (0.91, 1.30)        | 0.34        |              |            |   |              |   |  |
| cervical          | 2                             | 798/785     | 1.21 (1.02, 1.44) | 0.02       | 1.19 (0.75, 1.88) | 0.44       | 1.32 (1.05, 1.67) | 0.01       | 1.06 (0.74, 1.52) | 0.72       | 1.31 (1.05, 1.64)        | 0.01        | 1.15 (0.82, 1.62) | 0.40         | 0.90 (0.57, 1.41)        | 0.65        |              |            |   |              |   |  |
| gastric           | 12                            | 1976/3283   | 0.91 (0.80, 1.04) | 0.18       | 0.99 (0.75, 1.31) | 0.97       | 0.94 (0.80, 1.12) | 0.54       | 0.91 (0.73, 1.14) | 0.43       | 0.96 (0.81, 1.12)        | 0.63        | 0.90 (0.73, 1.13) | 0.38         | 0.93 (0.79, 1.08)        | 0.36        |              |            |   |              |   |  |
| Asian             | 8                             | 1390/2232   | 0.87 (0.75, 1.00) | 0.05       | 0.86 (0.65, 1.12) | 0.27       | 1.03 (0.81, 1.32) | 0.76       | 0.80 (0.67, 0.96) | 0.01       | 0.94 (0.75, 1.19)        | 0.64        | 0.80 (0.66, 0.97) | <b>0.02</b>  | <b>0.83 (0.71, 0.97)</b> | <b>0.02</b> |              |            |   |              |   |  |
| European          | 2                             | 227/796     | 1.00 (0.69, 1.45) | 0.97       | 1.27 (0.49, 3.29) | 0.61       | 0.83 (0.59, 1.15) | 0.26       | 1.57 (0.68, 3.63) | 0.28       | 0.92 (0.68, 1.25)        | 0.60        | 1.38 (0.55, 3.41) | 0.48         | 1.26 (0.91, 1.73)        | 0.15        |              |            |   |              |   |  |
| hepatocellular    | 3                             | 807/977     | 1.00 (0.86, 1.15) | 0.99       | 0.90 (0.64, 1.28) | 0.58       | 1.03 (0.82, 1.28) | 0.79       | 0.97 (0.67, 1.39) | 0.87       | 1.00 (0.81, 1.24)        | 0.93        | 0.96 (0.68, 1.36) | 0.85         | 0.99 (0.80, 1.22)        | 0.92        |              |            |   |              |   |  |
| ovarian           | 1                             | 147/129     | 1.23 (0.83, 1.81) | 0.28       | 1.33 (0.44, 4.02) | 0.61       | 1.33 (0.81, 2.18) | 0.25       | 1.00 (0.32, 3.07) | 1.00       | 1.33 (0.82, 2.14)        | 0.23        | 1.18 (0.39, 3.49) | 0.76         | 0.76 (0.47, 1.24)        | 0.28        |              |            |   |              |   |  |
| prostate          | 6                             | 2700/3169   | 0.93 (0.80, 1.09) | 0.41       | 0.90 (0.66, 1.21) | 0.50       | 0.89 (0.74, 1.08) | 0.26       | 0.99 (0.82, 1.19) | 0.91       | 0.89 (0.73, 1.10)        | 0.29        | 0.95 (0.77, 1.17) | 0.64         | 1.06 (0.93, 1.20)        | 0.37        |              |            |   |              |   |  |
| Study design      |                               |             |                   |            |                   |            |                   |            |                   |            |                          |             |                   |              |                          |             |              |            |   |              |   |  |
| HCC               | 36                            | 6171/7722   | 0.91 (0.85, 0.96) | 0.00       | 0.81 (0.70, 0.95) | 0.01       | 0.90 (0.83, 0.97) | 0.01       | 0.95 (0.84, 1.07) | 0.45       | 0.89 (0.82, 0.96)        | 0.00        | 0.90 (0.79, 1.01) | 0.08         | 1.03 (0.96, 1.11)        | 0.33        |              |            |   |              |   |  |
| PCC               | 25                            | 7542/10545  | 1.00 (0.93, 1.08) | 0.86       | 0.98 (0.85, 1.14) | 0.87       | 1.01 (0.92, 1.10) | 0.80       | 0.98 (0.88, 1.09) | 0.78       | 1.01 (0.92, 1.11)        | 0.78        | 0.98 (0.87, 1.11) | 0.80         | 0.98 (0.91, 1.07)        | 0.79        |              |            |   |              |   |  |
| Sample size       |                               |             |                   |            |                   |            |                   |            |                   |            |                          |             |                   |              |                          |             |              |            |   |              |   |  |
| <500              | 42                            | 4896/6329   | 0.90 (0.84, 0.96) | 0.00       | 0.79 (0.68, 0.92) | 0.00       | 0.90 (0.82, 0.99) | 0.04       | 0.92 (0.81, 1.03) | 0.18       | 0.89 (0.81, 0.97)        | 0.01        | 0.87 (0.77, 0.98) | <b>0.02</b>  | 1.00 (0.92, 1.08)        | 0.89        |              |            |   |              |   |  |
| ≥500              | 20                            | 9027/12142  | 1.00 (0.93, 1.07) | 0.88       | 1.00 (0.87, 1.15) | 0.90       | 0.98 (0.91, 1.07) | 0.77       | 1.02 (0.91, 1.13) | 0.72       | 0.99 (0.91, 1.08)        | 0.90        | 1.01 (0.90, 1.14) | 0.79         | 1.01 (0.94, 1.09)        | 0.63        |              |            |   |              |   |  |
| Genotyping method |                               |             |                   |            |                   |            |                   |            |                   |            |                          |             |                   |              |                          |             |              |            |   |              |   |  |
| PCR-RFLP          | 14                            |             | 0.90 (0.80, 1.02) | 0.12       | 0.75 (0.57, 0.99) | 0.05       | 0.75 (0.57, 0.99) | 0.21       | 0.94 (0.83, 1.07) | 0.40       | 0.84 (0.67, 1.05)        | 0.14        | 0.89 (0.79, 1.01) | 0.09         | 0.99 (0.89, 1.10)        | 0.88        |              |            |   |              |   |  |
| TaqMan            | 22                            |             | 1.00 (0.94, 1.08) | 0.81       | 1.00 (0.85, 1.16) | 0.99       | 1.00 (0.85, 1.16) | 0.71       | 1.04 (0.89, 1.22) | 0.58       | 0.99 (0.91, 1.06)        | 0.81        | 1.03 (0.88, 1.20) | 0.66         | 1.02 (0.94, 1.11)        | 0.50        |              |            |   |              |   |  |
| other             | 26                            |             | 0.91 (0.84, 0.99) | 0.03       | 0.90 (0.76, 1.06) | 0.23       | 0.90 (0.76, 1.06) | 0.15       | 0.90 (0.79, 1.04) | 0.17       | 0.92 (0.83, 1.01)        | 0.10        | 0.88 (0.77, 1.02) | 0.09         | 0.99 (0.90, 1.10)        | 0.97        |              |            |   |              |   |  |

<sup>a</sup>Number of studies. CI, confidence interval; HWE, Hardy-Weinberg equilibrium; OR, odds ratio.
