# Supplementary material
Source: PubMed Central journal article supplement (PMC3615694)
Supplement: Supp_Table3.pdf [file Supp_Table3.pdf]

SUPPLEMENTARY TABLE S3. HETEROGENEITY TEST FOR STUDIES OF EACH GENOTYPE IN SENSITIVITY ANALYSES FOR OVERALL AND SUBGROUPS WITH COCHRAN'S Q TEST AND THE QUANTITY I<sup>2</sup>

| Group             | T vs. C        |       |       | TT vs. CC              |       |       | CT vs. CC              |       |       | TT vs. CT              |       |       | TT/CT vs. CC           |       |       | TT vs. CT/CC           |       |       | TT/CC vs. CT           |       |       |                        |  |
|-------------------|----------------|-------|-------|------------------------|-------|-------|------------------------|-------|-------|------------------------|-------|-------|------------------------|-------|-------|------------------------|-------|-------|------------------------|-------|-------|------------------------|--|
|                   | N <sup>a</sup> | Q     | P (%) | I <sup>2</sup> (95%CI) | Q     | P (%) | I <sup>2</sup> (95%CI) | Q     | P (%) | I <sup>2</sup> (95%CI) | Q     | P (%) | I <sup>2</sup> (95%CI) | Q     | P (%) | I <sup>2</sup> (95%CI) | Q     | P (%) | I <sup>2</sup> (95%CI) | Q     | P (%) | I <sup>2</sup> (95%CI) |  |
| Overall           | 62             | 94.64 | 0.00  | 35 (12, 53)            | 77.63 | 0.07  | 21 (0, 43)             | 66.97 | 0.28  | 8 (0, 34)              | 69.62 | 0.21  | 12 (0, 37)             | 78.18 | 0.07  | 22 (0, 44)             | 78.80 | 0.06  | 22 (0, 44)             | 67.54 | 0.26  | 9 (0, 34)              |  |
| Ethnicity         |                |       |       |                        |       |       |                        |       |       |                        |       |       |                        |       |       |                        |       |       |                        |       |       |                        |  |
| Asian             | 24             | 32.73 | 0.09  | 29 (0, 57)             | 25.35 | 0.33  | 9 (0, 43)              | 21.81 | 0.53  | 0 (0, 45)              | 29.31 | 0.17  | 21 (0, 52)             | 24.30 | 0.39  | 5 (0, 37)              | 31.81 | 0.10  | 27 (0, 56)             | 27.04 | 0.25  | 14 (0, 48)             |  |
| European          | 25             | 45.36 | 0.01  | 47 (16, 67)            | 36.23 | 0.05  | 33 (0, 59)             | 34.01 | 0.09  | 29 (0, 57)             | 30.01 | 0.18  | 20 (0, 51)             | 39.47 | 0.02  | 39 (2, 62)             | 34.37 | 0.08  | 30 (0, 57)             | 31.61 | 0.14  | 24 (0, 54)             |  |
| Cancer type       |                |       |       |                        |       |       |                        |       |       |                        |       |       |                        |       |       |                        |       |       |                        |       |       |                        |  |
| breast            | 3              | 0.36  | 0.83  | 0 (0, 90)              | 1.10  | 0.58  | 0 (0, 90)              | 0.23  | 0.89  | 0 (0, 90)              | 1.50  | 0.47  | 0 (0, 90)              | 0.06  | 0.97  | 0 (0, 90)              | 1.33  | 0.51  | 0 (0, 90)              | 0.49  | 0.78  | 0 (0, 90)              |  |
| cervical          | 2              | 0.15  | 0.70  | 0                      | 0.00  | 0.98  | 0                      | 0.49  | 0.48  | 0                      | 0.80  | 0.37  | 0                      | 0.20  | 0.66  | 0                      | 0.12  | 0.72  | 0                      | 3.27  | 0.07  | 69                     |  |
| gastric           | 12             | 20.67 | 0.04  | 46 (0, 73)             | 17.38 | 0.10  | 36 (0, 68)             | 8.23  | 0.69  | 0 (0, 58)              | 23.81 | 0.01  | 53 (11, 76)            | 10.12 | 0.52  | 0 (0, 58)              | 25.36 | 0.01  | 56 (17, 77)            | 17.78 | 0.09  | 38 (0, 69)             |  |
| Asian             | 8              | 12.09 | 0.09  | 42 (0, 74)             | 8.18  | 0.31  | 14 (0, 57)             | 4.48  | 0.72  | 0 (0, 68)              | 10.17 | 0.17  | 31 (0, 69)             | 6.19  | 0.51  | 0 (0, 68)              | 11.89 | 0.10  | 41 (0, 74)             | 8.39  | 0.29  | 16 (0, 60)             |  |
| European          | 2              | 2.10  | 0.14  | 52                     | 2.33  | 0.12  | 57                     | 0.09  | 0.76  | 0                      | 1.75  | 0.18  | 43                     | 0.78  | 0.37  | 0                      | 2.22  | 0.13  | 55                     | 0.01  | 0.94  | 0                      |  |
| hepatocellular    | 3              | 2.01  | 0.37  | 0 (0, 90)              | 0.98  | 0.61  | 0 (0, 90)              | 0.30  | 0.86  | 0 (0, 90)              | 3.10  | 0.21  | 35 (0, 79)             | 0.37  | 0.83  | 0 (0, 90)              | 3.08  | 0.21  | 35 (0, 79)             | 2.20  | 0.33  | 9 (0, 91)              |  |
| prostate          | 6              | 13.09 | 0.02  | 61 (7, 84)             | 9.41  | 0.09  | 46 (0, 79)             | 9.06  | 0.11  | 44 (0, 78)             | 3.91  | 0.56  | 0 (0, 75)              | 12.17 | 0.03  | 58 (0, 83)             | 6.46  | 0.26  | 22 (0, 67)             | 6.06  | 0.30  | 17 (0, 62)             |  |
| Study design      |                |       |       |                        |       |       |                        |       |       |                        |       |       |                        |       |       |                        |       |       |                        |       |       |                        |  |
| HCC               | 36             | 39.42 | 0.27  | 11 (0, 41)             | 44.76 | 0.12  | 21 (0, 48)             | 29.48 | 0.73  | 0 (0, 38)              | 44.09 | 0.13  | 20 (0, 48)             | 32.40 | 0.59  | 0 (0, 38)              | 45.90 | 0.10  | 23 (0, 50)             | 32.54 | 0.58  | 0 (0, 38)              |  |
| PCC               | 25             | 49.69 | 0.00  | 51 (24, 69)            | 28.93 | 0.22  | 17 (0, 49)             | 3.69  | 0.09  | 28 (0, 56)             | 24.54 | 0.43  | 2 (0, 45)              | 41.12 | 0.01  | 41 (6, 64)             | 30.55 | 0.16  | 21 (0, 52)             | 34.37 | 0.07  | 30 (0, 57)             |  |
| Sample size       |                |       |       |                        |       |       |                        |       |       |                        |       |       |                        |       |       |                        |       |       |                        |       |       |                        |  |
| <500              | 42             | 49.57 | 0.17  | 17 (0, 44)             | 44.27 | 0.34  | 7 (0, 36)              | 37.84 | 0.61  | 0 (0, 35)              | 46.15 | 0.27  | 11 (0, 39)             | 42.31 | 0.41  | 3 (0, 29)              | 47.63 | 0.22  | 13 (0, 42)             | 42.10 | 0.42  | 2 (0, 27)              |  |
| ≥500              | 20             | 39.21 | 0.00  | 51 (19, 71)            | 27.73 | 0.09  | 31 (0, 60)             | 27.21 | 0.10  | 30 (0, 59)             | 21.56 | 0.31  | 11 (0, 47)             | 32.77 | 0.03  | 42 (1, 66)             | 26.69 | 0.11  | 28 (0, 59)             | 25.37 | 0.15  | 25 (0, 59)             |  |
| Genotyping method |                |       |       |                        |       |       |                        |       |       |                        |       |       |                        |       |       |                        |       |       |                        |       |       |                        |  |
| PCR-RFLP          | 14             | 26.45 | 0.02  | 50 (9, 73)             | 25.27 | 0.02  | 48 (5, 72)             | 25.99 | 0.02  | 50 (8, 73)             | 9.53  | 0.73  | 0 (0, 55)              | 31.36 | 0.00  | 58 (25, 77)            | 13.39 | 0.42  | 2 (0, 56)              | 9.94  | 0.70  | 0 (0, 55)              |  |
| TaqMan            | 22             | 34.23 | 0.03  | 38 (0, 63)             | 28.04 | 0.14  | 25 (0, 56)             | 24.35 | 0.28  | 13 (0, 48)             | 30.74 | 0.08  | 31 (0, 59)             | 26.06 | 0.20  | 19 (0, 52)             | 32.73 | 0.05  | 35 (0, 62)             | 28.99 | 0.11  | 27 (0, 57)             |  |
| other             | 26             | 29.46 | 0.25  | 15 (0, 47)             | 19.56 | 0.77  | 0 (0, 43)              | 15.39 | 0.93  | 0 (0, 43)              | 26.23 | 0.40  | 4 (0, 35)              | 18.56 | 0.82  | 0 (0, 43)              | 27.98 | 0.31  | 10 (0, 44)             | 28.15 | 0.30  | 11 (0, 44)             |  |

<sup>a</sup>Number of studies. CI, confidence interval; HWE, Hardy-Weinberg equilibrium.
