# Supplementary material
Source: PubMed Central journal article supplement (PMC3615694)
Supplement: Supp_Table4.pdf [file Supp_Table4.pdf]

SUPPLEMENTARY TABLE S4. DESCRIPTION OF PUBLISHED META-ANALYSES  
FOR THE *IL-10* -819C/T POLYMORPHISM AND CANCER RISK

| <i>First author</i> | <i>Year</i> | <i>Cancer type</i>       | <i>N</i> <sup>a</sup> | <i>Cases/Controls</i> | <i>Significant associated genetic model</i> | <i>OR (95% CI)</i> | <i>Heterogeneity</i> |                           |
|---------------------|-------------|--------------------------|-----------------------|-----------------------|---------------------------------------------|--------------------|----------------------|---------------------------|
|                     |             |                          |                       |                       |                                             |                    | <i>P</i>             | <i>I</i> <sup>2</sup> (%) |
| Xue                 | 2012        | gastric cancer           | 11                    | 1490/4008             | Asians: TT vs. CT                           | 0.83               | 0.13                 | 38.9                      |
| Zou                 | 2011        | prostate cancer          | 7                     | 2939/3899             | Asians: TT vs. CT/CC                        | 0.82 (0.70–0.96)   |                      |                           |
| Wei                 | 2011        | hepatocellular carcinoma | 3                     | 395/612               | NS                                          |                    |                      |                           |
| Shao                | 2011        | prostate cancer          | 6                     | 2827/3685             | NS                                          |                    |                      |                           |
| Persson             | 2011        | gastric cancer           | 5                     | 573/1452              | NS                                          |                    |                      |                           |
| Chen                | 2010        | gastric cancer           | 6                     | 681/1621              | Asians: TT                                  | 0.59 (0.44, 0.79)  | 0.005                |                           |
|                     |             |                          |                       |                       | Asians: CT                                  | 1.39 (1.05, 1.83)  | 0.06                 |                           |

<sup>a</sup>Number of studies. CI, confidence interval; NS, no significance.
